# Supplementary material for: Functional Characterization of Rare Variants in the SHOX2 Gene Identified in Sinus Node Dysfunction and Atrial Fibrillation
Source: PubMed Central journal article supplement (PMC6637028; doi:10.3389/fgene.2019.00648), 2019-07-11
Supplement: DataSheet_1.pdf [file DataSheet_1.pdf]

|            |     |                                    | p. P33R |                                                | p. G77D                             |       |     |
|------------|-----|------------------------------------|---------|------------------------------------------------|-------------------------------------|-------|-----|
| Human      | 1   | MEELTAFVSKSFDQKVKEKKEAITREVLESG    | R       | LRGAKEPTGCT-EAGRDRSSPAVRAAGGGGGGGGGGGGGGG      | G                                   | 77    |     |
| Chimpanzee | 1   | MEELTAFVSKSFDQKVKEKKEAITREVLESG    | R       | LRGAKEPTGCT-EAGRDRSSPAVRAAGGGGGGGGGGGGGGG      | G                                   | 77    |     |
| Pig        | 1   | MEELTAFVSKSFDQKVKEKKEAITREVLESG    | R       | LRGAKEPTGYA-EPGRDRSSPAVRAAGGGGGGGGGGGGGGG      | G                                   | 79    |     |
| Mouse      | 1   | MEELTAFVSKSFDQKVKEKKEAITREVLESG    | R       | LRGAKEP-GCV-EPGRDRSSPAVRAAGGGGGAGGGGGGG-GGGGGG | G                                   | 77    |     |
| Rat        |     | -----                              |         | -----                                          |                                     |       |     |
| Chicken    | 1   | MEELTAFVSKSFDPKAKEKELITYREVLESG    | R       | LRGAREPGGAAAEFGRDETGSPA                        |                                     | 56    |     |
| Zebrafish  | 1   | MEELTAFVSKSFDQKVKEKKEIVTYREVLETS   | R       | VRN-RES--LSADPNREISSIT                         |                                     | 53    |     |
| Frog       | 1   | MEELTAFVSKSFDQKIKKKEKEMITYREVLESG  | R       | ARG-KEP-GCG-EGARED                             | G                                   | 62    |     |
|            |     |                                    |         |                                                |                                     |       |     |
|            |     | <b>p. G81E</b>                     |         |                                                |                                     |       |     |
| Human      | 78  | VGGGGAGGGAGGGRS                    | FVRE    | LDMGAAERSREP                                   | SGSPRLTEGRRKPTKAEVQATLLLPGEAFRFLVSP | PELKD | 155 |
| Chimpanzee | 78  | VGGGGAGGGAGGGRS                    | FVRE    | LDMGAAERSREP                                   | SGSPRLTEGRRKPTKAEVQATLLLPGEAFRFLVSP | PELKD | 155 |
| Pig        | 80  | AGGGGAGGGAGGGRS                    | FVRE    | LDMGAAERSREP                                   | SGSPRLTE-----                       | VSP   | 133 |
| Mouse      | 78  | AGGGGAGGGAGGGRS                    | FVRE    | LDMGAAERSREP                                   | SGSPRLTE-----                       | VSP   | 131 |
| Rat        | 1   | -----                              | MGA     | ERSREP                                         | SGSPRLTE-----                       | VSP   | 33  |
| Chicken    | 57  | -----                              | GR      | AGGGRSPP                                       | REPDAAAADRAADAATPKLSD-----          | VSP   | 103 |
| Zebrafish  | 54  | -----                              | RSG     | VRSSPV                                         | READMLASERSRDSSSPKLTD-----          | GNTDM | 99  |
| Frog       | 63  | -----                              | G       | GGGGARS                                        | FVLELDL-SVERIRESGSPKLTE-----        | VSP   | 111 |
|            |     |                                    |         |                                                |                                     |       |     |
|            |     | <b>p. R194X</b>                    |         |                                                |                                     |       |     |
| Human      | 156 | DEGQTKIKQRSRTNFTLEQLNELERLDFETHYPD | AFMR    | RELS                                           | QLGLSEARVQVWFQNRRAKCRKQENQLHKG      | VLI   | 235 |
| Chimpanzee | 156 | DEGQTKIKQRSRTNFTLEQLNELERLDFETHYPD | AFMR    | RELS                                           | QLGLSEARVQVWFQNRRAKCRKQENQLHKG      | VLI   | 235 |
| Pig        | 134 | DEGQTKIKQRSRTNFTLEQLNELERLDFETHYPD | AFMR    | RELS                                           | QLGLSEARVQVWFQNRRAKCRKQENQLHKG      | VLI   | 213 |
| Mouse      | 132 | DEGQTKIKQRSRTNFTLEQLNELERLDFETHYPD | AFMR    | RELS                                           | QLGLSEARVQVWFQNRRAKCRKQENQLHKG      | VLI   | 211 |
| Rat        | 34  | DEGQTKIKQRSRTNFTLEQLNELERLDFETHYPD | AFMR    | RELS                                           | QLGLSEARVQVWFQNRRAKCRKQENQLHKG      | VLI   | 113 |
| Chicken    | 104 | DEGQTKIKQRSRTNFTLEQLNELERLDFETHYPD | AFMR    | RELS                                           | QLGLSEARVQVWFQNRRAKCRKQENQLHKG      | VLI   | 183 |
| Zebrafish  | 100 | DETQTKIKQRSRTNFTLEQLNELERLDFETHYPD | AFMR    | RELS                                           | QLGLSEARVQVWFQNRRAKCRKQENQLHKG      | VLI   | 179 |
| Frog       | 112 | EEGQTKIKQRSRTNFTLEQLNELERLDFETHYPD | AFMR    | RELS                                           | QLGLSEARVQVWFQNRRAKCRKQENQLHKG      | VLI   | 191 |
|            |     |                                    |         |                                                |                                     |       |     |
|            |     |                                    |         | p. H283Q                                       | p. A293=                            |       |     |
| Human      | 236 | SQFEACRVAPYVNVGALRMPFQQD           | SHCNV   | TPLS                                           | FQVQALQDSAVAHHHHHPHLA               | AHAPY | 315 |
| Chimpanzee | 236 | SQFEACRVAPYVNVGALRMPFQQD           | SHCNV   | TPLS                                           | FQVQALQDSAVAHHHHHPHLA               | AHAPY | 315 |
| Pig        | 214 | SQFEACRVAPYVNVGALRMPFQQD           | SHCNV   | TPLS                                           | FQVQALQDSAVAHHHHHPHLA               | AHAPY | 293 |
| Mouse      | 212 | SQFEACRVAPYVNVGALRMPFQQD           | -----   | VQ                                             | AQALQDSAVAHHHHHPHLA                 | AHAPY | 279 |
| Rat        | 114 | SQFEACRVAPYVNVGALRMPFQQD           | SHCNV   | TPLS                                           | FQVQAHVQDSAVAHHHHHPHLA              | AHAPY | 193 |
| Chicken    | 184 | SQFEACRVAPYVNVGALRMPFQQD           | -----   | VQ                                             | AQALQDSAVAHHHHHPHLA                 | AHAPY | 249 |
| Zebrafish  | 180 | SQFEACRVAPYVNVGALRMPFQQD           | SHCNV   | PPSF                                           | FQVQALQDSAVAHHHHHPHLA               | AHAPY | 259 |
| Frog       | 192 | SQFEACRVAPYVNVGALRMPFQQD           | SHCNV   | TPLS                                           | FQVQALQDSAVAHHHHHPHLA               | AHAPY | 271 |
|            |     |                                    |         |                                                |                                     |       |     |
| Human      | 316 | DSASAASVAAAAAAKTTSKNSSI            | IADRL   | LKAKK                                          | HAAALGL                             |       | 355 |
| Chimpanzee | 316 | DSASAASVAAAAAAKTTSKNSSI            | IADRL   | LKAKK                                          | HAAALGL                             |       | 355 |
| Pig        | 294 | DSASAASVAAAAAAKTTSKNSSI            | IADRL   | LKAKK                                          | HAAALGL                             |       | 333 |
| Mouse      | 280 | DSASAASVAAAAAAKTTSKNSSI            | IADRL   | LKAKK                                          | HAAALGL                             |       | 319 |
| Rat        | 194 | DSASAASVAAAAAAKTTSKNSSI            | IADRL   | LKAKK                                          | HAAALGL                             |       | 233 |
| Chicken    | 250 | ESASAASVAAAAAAKTTSKNSSI            | IADRL   | LKAKK                                          | HAAALGL                             |       | 289 |
| Zebrafish  | 260 | ESASAASVAAAAAAKTTSKNSSI            | IADRL   | LKAKK                                          | HAAALGL                             |       | 299 |
| Frog       | 272 | ETATAASVAAAAAAKTTSKNSSI            | IADRL   | LKAKK                                          | HAAALGL                             |       | 311 |

**Suppl. Fig. 1. Multiple sequence alignment of SHOX2 protein among different species.** Novel identified variants are highlighted in red, while the previously reported variants are depicted in grey.

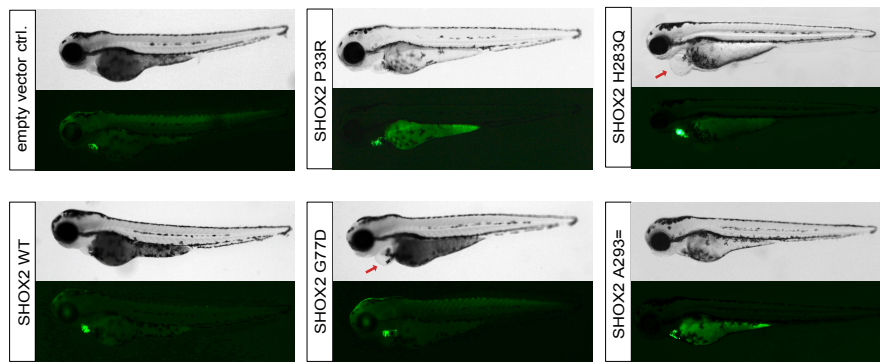

**Suppl. Fig. 2. Fluorescence imaging of cardiac-specific overexpression of SHOX2 mutants in zebrafish.** Bright field (upper image) and corresponding fluorescence imaging (lower image) of cardiac-specific overexpression of SHOX2 mutants compared to SHOX2 WT (wildtype) and empty vector control show pericardial edema (red arrow) for p.G77D and p.H283Q but not for p.P33R and p.A293= 72hpf.
