# Supplementary material for: Functional Characterization of Rare Variants in the SHOX2 Gene Identified in Sinus Node Dysfunction and Atrial Fibrillation
Source: Front Genet. 2019 Jul 11;10:648. doi: 10.3389/fgene.2019.00648 (PMC6637028; doi:10.3389/fgene.2019.00648)
Supplement: Supplementary file 1 [file Table_1.xlsx]

## Sheet: Suppl. Table 1
Variable	All (450)	Male (311)	Female (139)
Sex (Female)	30.9% (139/450)	0% (0/311)	100.0% (139/139)
Age at study enrollment [y]	64.4 (8.4)	64.5 (8.4)	64.2 (8.7)
CVRFs:
Diabetes (yes)	22.4% (101/450)	23.5% (73/311)	20.1% (28/139)
Obesity (yes)	37.1% (167/450)	35.0% (109/311)	41.7% (58/139)
Smoking (yes)	13.6% (61/448)	13.9% (43/310)	13.0% (18/138)
Hypertension (yes)	71.6% (322/450)	71.7% (223/311)	71.2% (99/139)
Dyslipidemia (yes)	69.8% (314/450)	73.6% (229/311)	61.2% (85/139)
FH of MI/Stroke (yes)	24.9% (112/450)	23.5% (73/311)	28.1% (39/139)
Comorbidities:
MI (yes)	15.1% (67/443)	16.3% (50/306)	12.4% (17/137)
CAD (yes)	23.0% (99/430)	24.9% (75/301)	18.6% (24/129)
Stroke (yes)	8.5% (38/446)	9.8% (30/307)	5.8% (8/139)
AF (yes)	100.0% (450/450)	100.0% (311/311)	100.0% (139/139)
PAD (yes)	8.1% (36/443)	8.2% (25/306)	8.0% (11/137)
CHF (yes)	12.4% (56/450)	10.0% (31/311)	18.0% (25/139)
Echo:
LA Volume (Biplane) [cm³]	89.2 (34.1)	95.3 (34.8)	76.1 (28.5)
EF [%]	60.3 (8.6)	59.9 (8.7)	61.3 (8.4)
E/E´	8.95 (3.96)	8.65 (3.93)	9.62 (3.94)
ECG:
RRInterval [ms]	936 (220)	926 (229)	957 (197)
PQInterval [ms]	170 (28)	172 (29)	165 (27)
QRSDuration	102.6 (20.3)	104.6 (20.3)	98.0 (19.6)
QTInterval	417 (46)	414 (46)	424 (43)
Suppl. Table 1. Clinical characteristics of AF cohort. Data are presented as mean ±SD.
