# Supplementary material for: Functional Characterization of Rare Variants in the SHOX2 Gene Identified in Sinus Node Dysfunction and Atrial Fibrillation
Source: Front Genet. 2019 Jul 11;10:648. doi: 10.3389/fgene.2019.00648 (PMC6637028; doi:10.3389/fgene.2019.00648)
Supplement: Supplementary file 2 [file Table_2.xlsx]

## Sheet: Suppl. Table 2
Variable	All (98)	Male (62)	Female (36)
Sex (Female)	37% (36/98)	0% (0/62)	100% (36/36)
Age at study enrollment [y]	75.7 (10.9)	76.1 (9.6)	75.0 (12.9)
Age at diagnosis [y]	71.0 (13.4)	71.3 (10.9)	70.5 (16.4)
CVRFs:
Diabetes (yes)	27.6% (27/98)	25.8% (16/62)	30.6% (11/36)
Obesity (yes)	n.a.	n.a.	n.a.
Smoking (yes)	20.4% (20/98)	29.0% (18/62)	5.6% (2/36)
Hypertension (yes)	94.9 % (93/98)	96.8% (60/62)	91.7% (33/36)
Dyslipidemia (yes)	56.1% (55/98)	64.5% (40/62)	41.7% (15/36)
FH of MI/Stroke (yes)	15.3% (15/98)	19.4% (12/62)	8.3% (3/36)
Comorbidities:
MI (yes)	21.4% (21/98)	24.2% (15/62)	16.7% (6/36)
CAD (yes)	54.1% (53/98)	62.9% (39/62)	38.9% (14/36)
Stroke (yes)	14.3% (14/98)	12.9% (8/62)	16.7% (6/36)
AF (yes)	68.4% (67/98)	59.7% (37/62)	83.3% (30/36)
PAD (yes)	14.3% (14/98)	19.4% (12/62)	5.6% (2/36)
CHF (yes)	33.7% (33/98)	38.7% (24/62)	25.0% (9/36)
AF (yes)	61.2% (60/98)	54.8% (34/62)	72.2% (26/36)
Echo:
LA Diameter [mm]	45.3 (10.7)	46.0 (10.7)	44.3 (10.9)
EF [%]	54.6% (13.7)	54.3% (15.0)	55.0% (11.0)
E/E´	n.a.	n.a.	n.a.
ECG:
RRInterval [ms]	919.4 (215.1)	928.2 (194.6)	903.8 (249.6)
PQInterval [ms]	190.0 (44.4)	190.4 (47.5)	189.1 (38.0)
QRSDuration	122.4 (38.5)	124.4 (37.5)	118.9 (40.6)
QTcInterval	438.3 (46.7)	440.3 (46.1)	434.9 (48.5)
Suppl. Table 2. Clinical characteristics of SND cohort. Data are presented as mean ±SD. n.a. = not available.
